# Supplementary material for: Direct conversion of injury-site myeloid cells to fibroblast-like cells of granulation tissue
Source: PubMed Central journal article supplement (PMC5838200; doi:10.1038/s41467-018-03208-w), 2018-03-05
Supplement: 41467_2018_3208_MOESM1_ESM.pdf [file 41467_2018_3208_MOESM1_ESM.pdf]

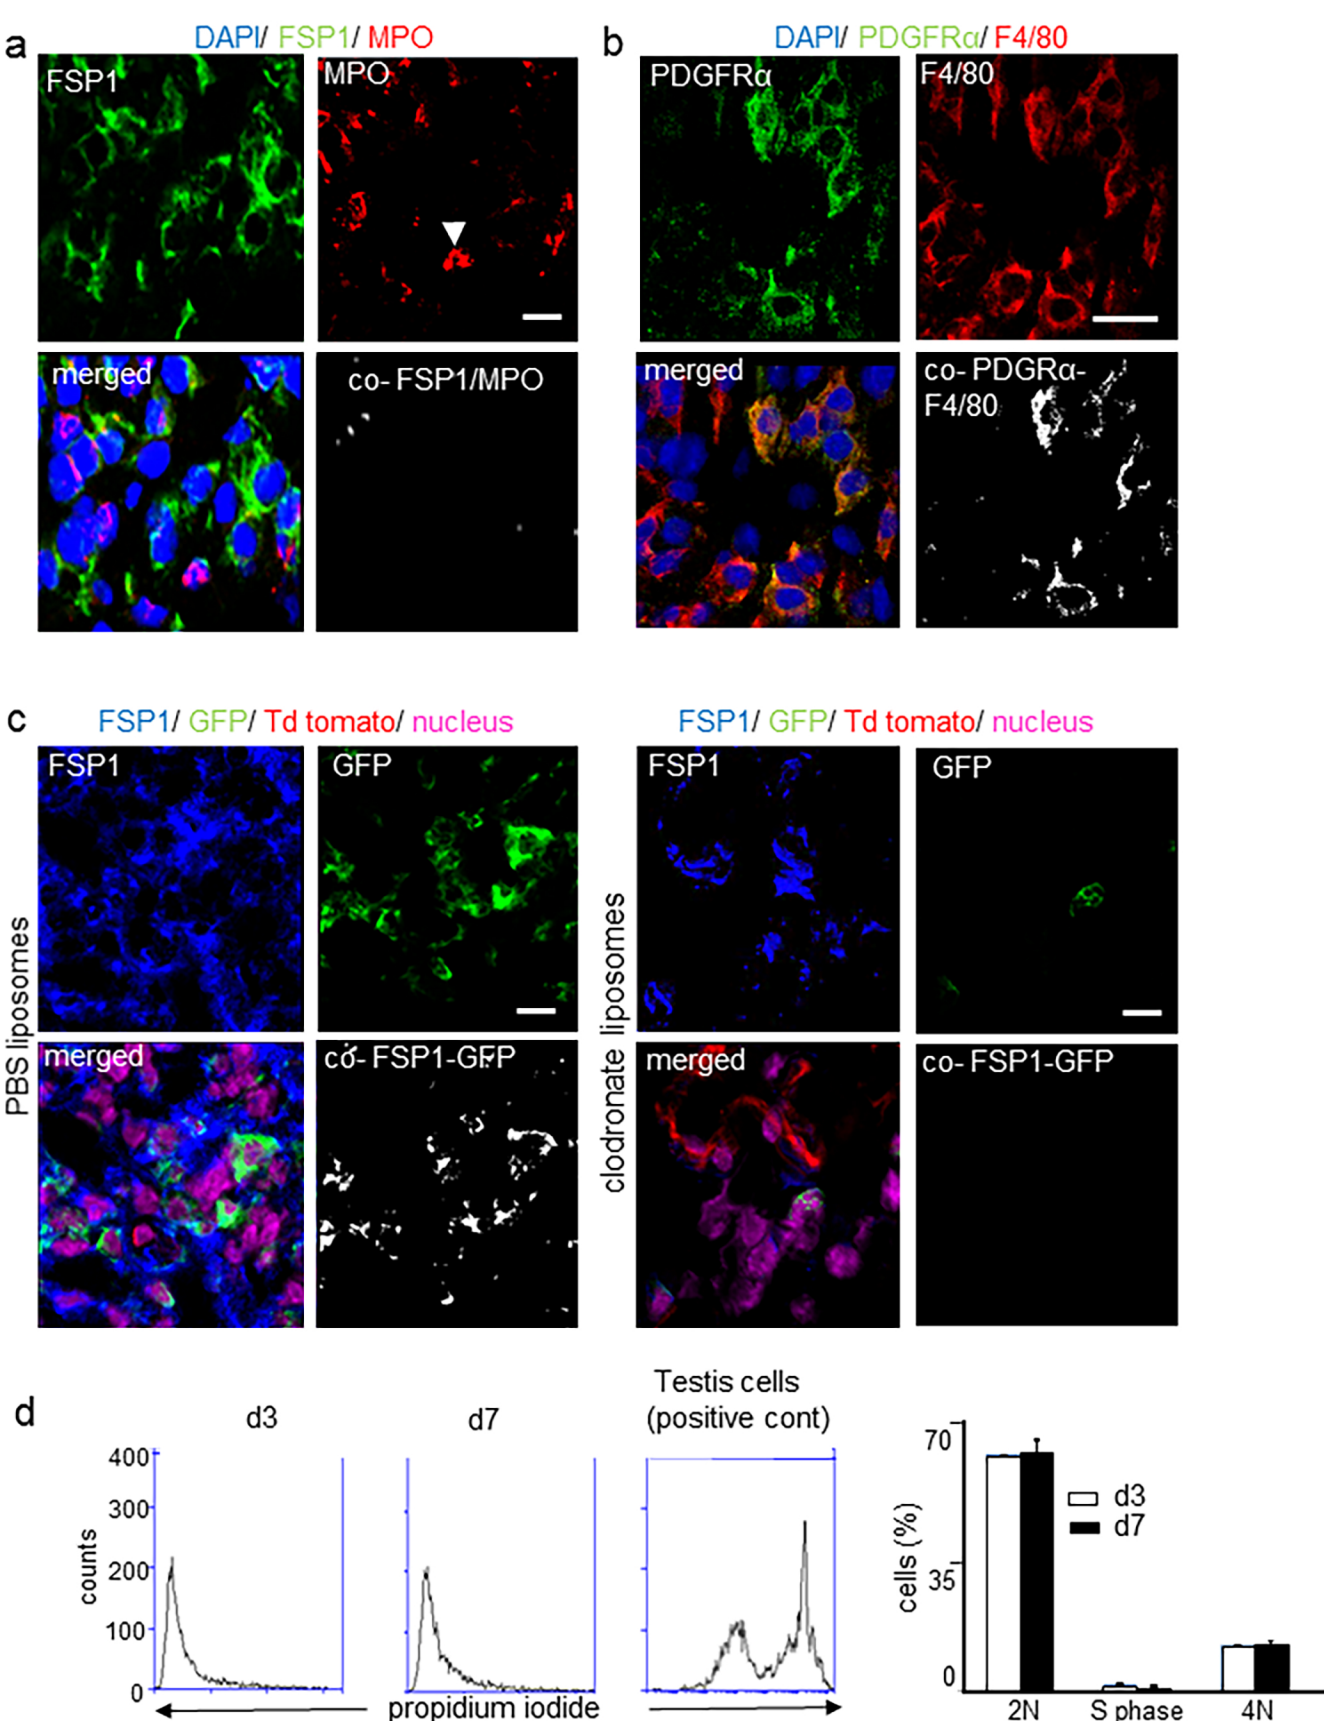

**Supplementary figure 1** (a)  $\alpha$ -MPO (neutrophil marker, red) and FSP1 (fibroblast marker, green) immuno-staining of d5 wound tissue from C57BL/6 mice with, n=5, scale bar =10  $\mu$ m. (b)  $\alpha$ -PDGFR $\alpha$  (fibroblast marker, green) and  $\alpha$ -F4/80 (macrophage marker, red) immuno-staining of d5 wound tissue from C57BL/6 mice, n=5, scale bar =10  $\mu$ m. (c)  $\alpha$ -FSP1(blue) immuno-staining and macrophages (GFP $^{+}$ , green) co-localization of d5 wound tissue of d5 wound tissue from LysM $^{Cre}$ Rosa $^{mT/mG}$  mice treated either with clodronate liposomes or liposomes PBS (control mice) liposomes, n=5, scale bar =10  $\mu$ m. (d) Propidium iodide staining for DNA ploidy assay with isolated wound macrophages at d3 and d7 post-wounding, n=5.

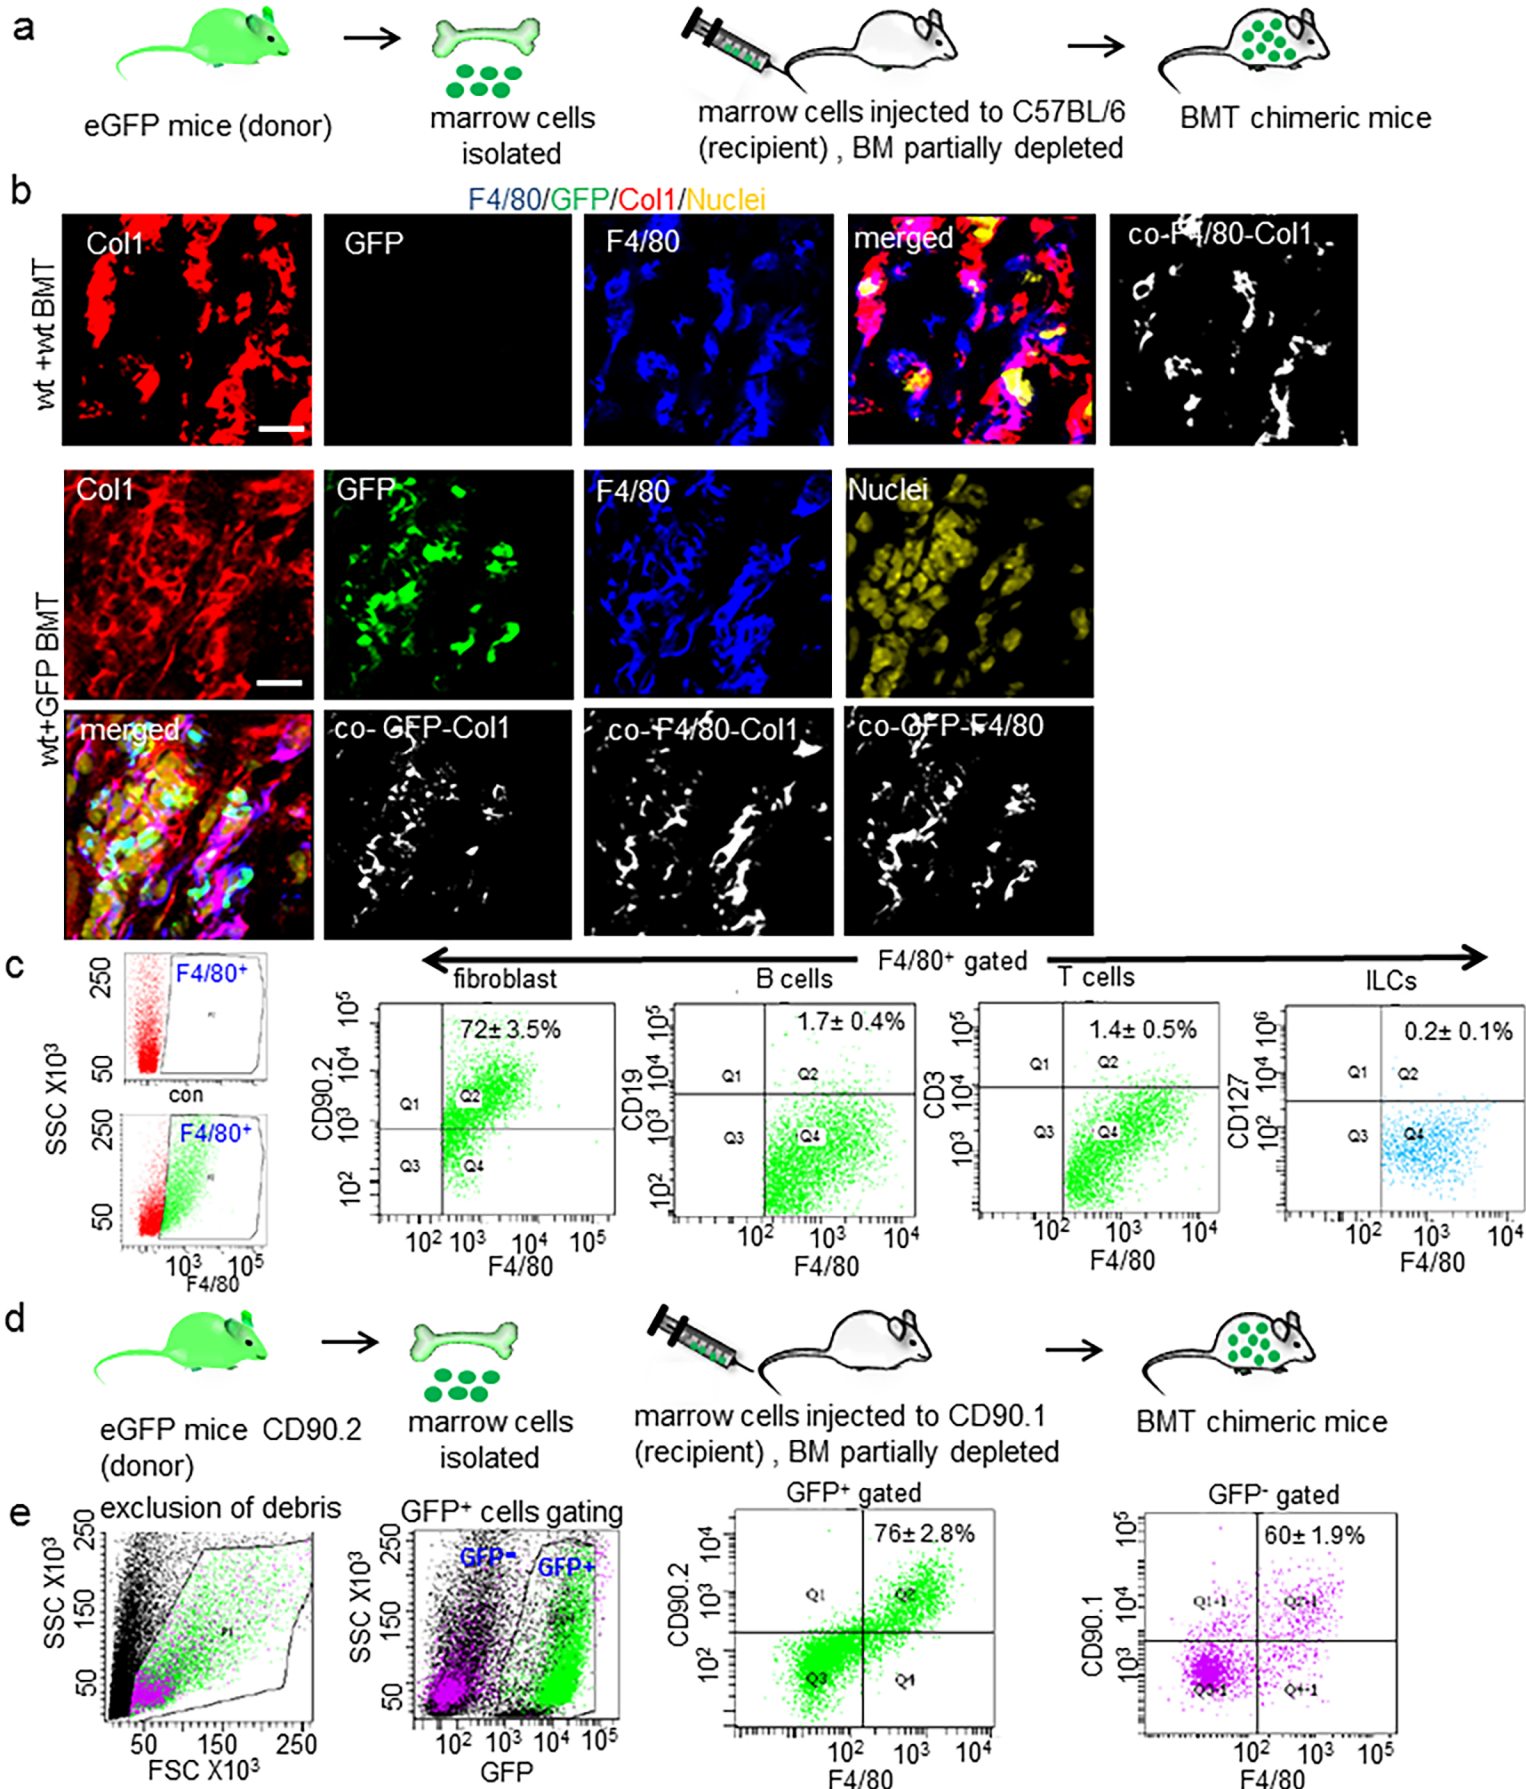

**Supplementary figure 2** (a) Schematic representation of bone marrow transplantation procedure with ACTb-EGFP mice (donor) and C57bl/6 mice (recipient). (b)  $\alpha$ -Col1 (fibroblast marker, red), marrow derived cells (GFP<sup>+</sup>, green), F4/80 (macrophages, blue) immuno-staining of d5 wound tissue from C57BL/6 mice transplanted with bone marrow of ACTb-EGFP mice, upper panel non-GFP BMT, middle and lower panels GFP BMT, n=5, scale bar = 10  $\mu$ m (c) Multicolor flow cytometry of CD11b<sup>+</sup> wound macrophages on d7 PW gated for F4/80<sup>+</sup> cells. The number of F4/80<sup>+</sup> cells dual positive for lymphoid markers were negligible (less than <2%). % data shown in Q2 are mean  $\pm$  SD (n=5). (d) Schematic representation of bone marrow transplantation from ACTb-EGFP mice with CD90.2 allele (donor) to B6 Thy 1.1 mice with CD90.1 allele (recipient). (e) Multicolor flow cytometry of CD11b<sup>+</sup> wound macrophages on d7 PW. The GFP<sup>+</sup> gated cells show dual positive for CD90.2 (from donor) and F4/80 (macrophages) while the GFP<sup>-</sup> gated cells display dual positive for CD90.1 (from recipient) and F4/80 (macrophages), n=4.

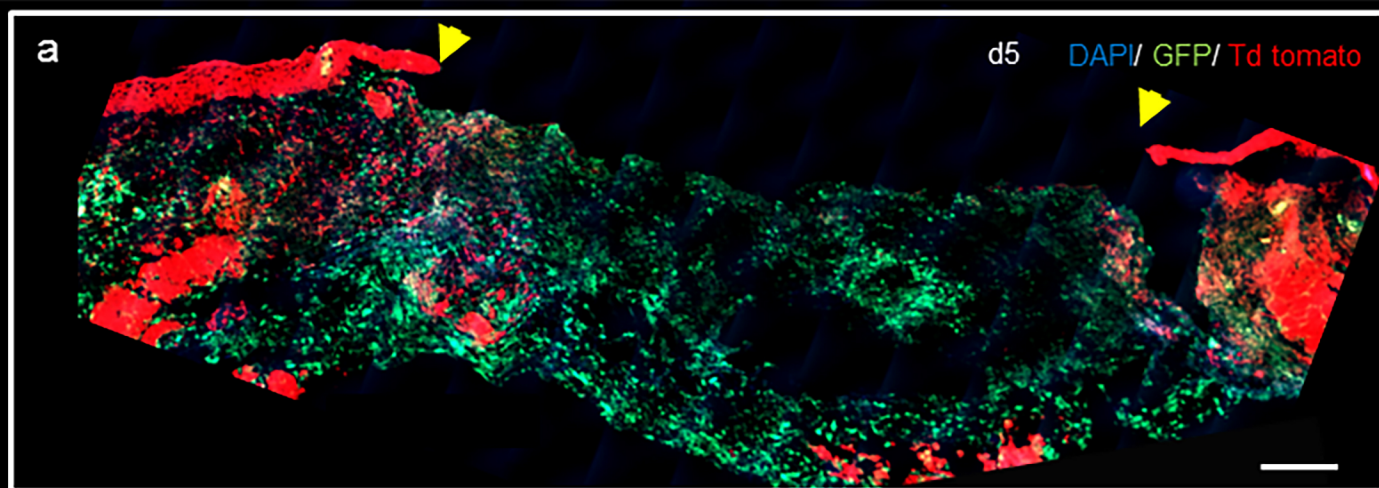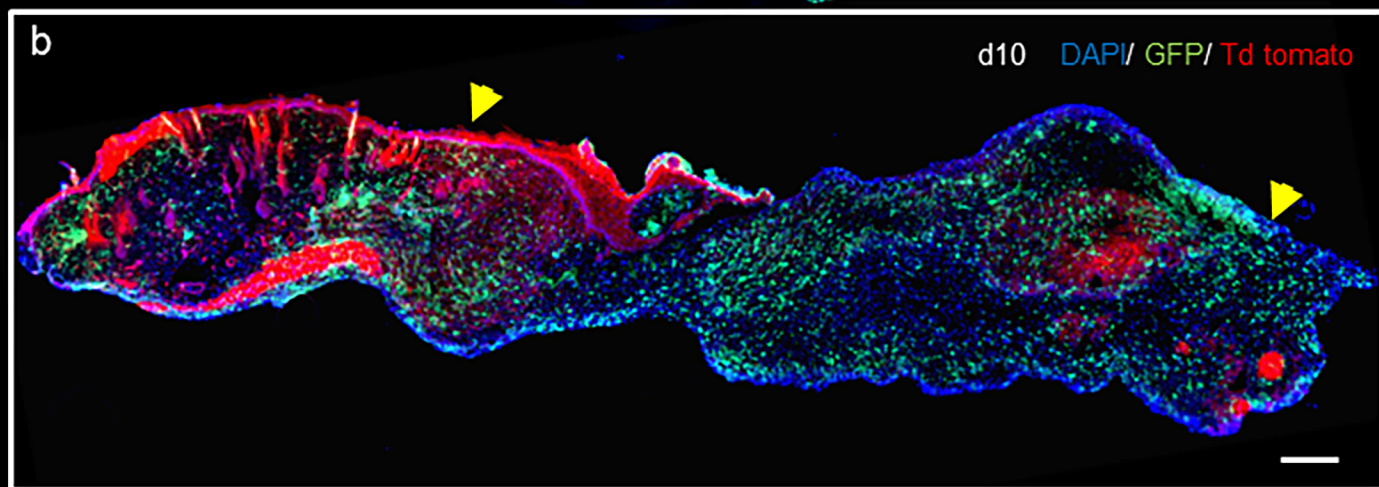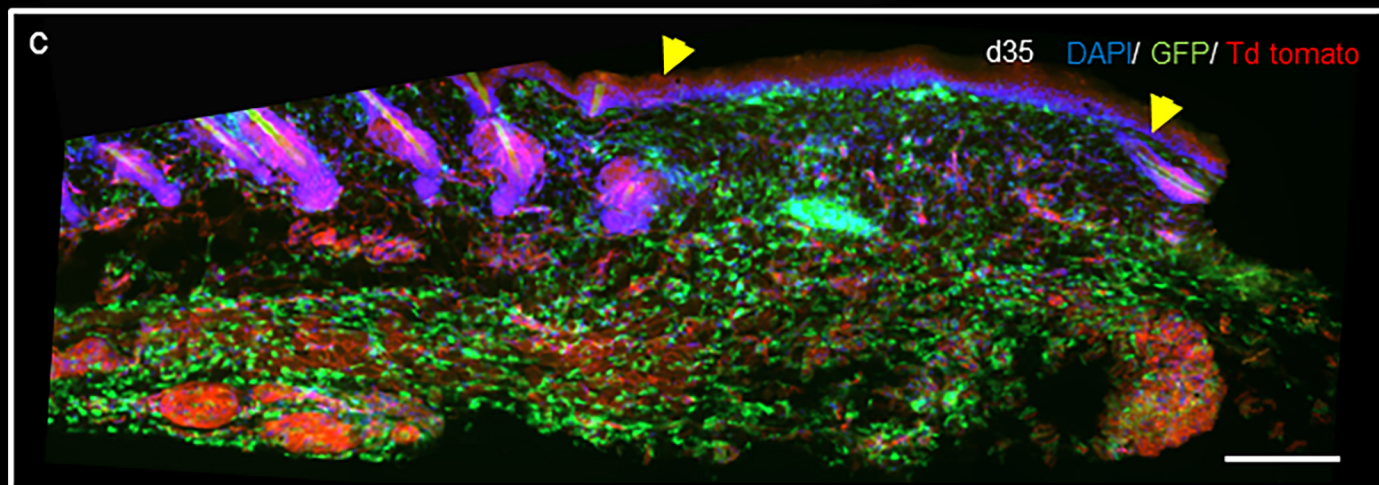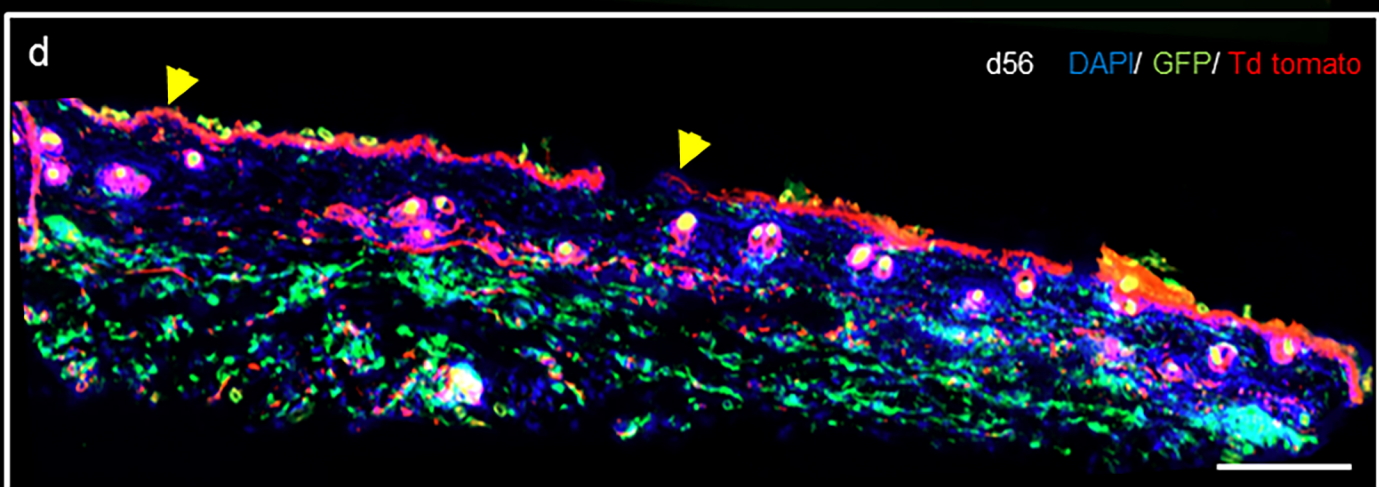

**Supplementary figure3** Whole mount of wounds from  $LysM^{Cre}Rosa^{mT/mG}$  mice at specified times post-wounding. Macrophage GFP<sup>+</sup> (green) while the rest of the cells are TdTomato (red), wound edge shown in yellow arrow heads. scale bar = 200  $\mu$ m.

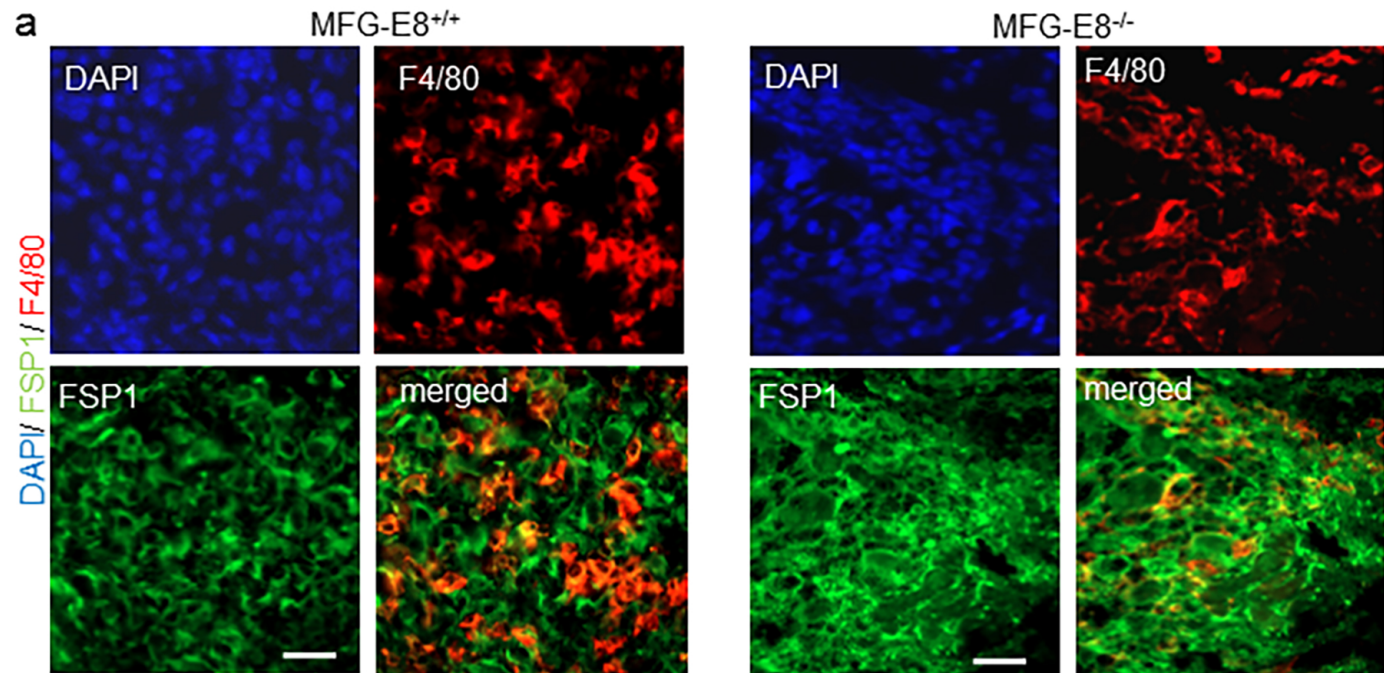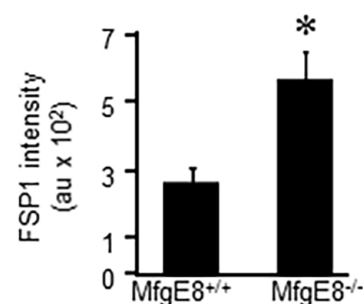

**c**

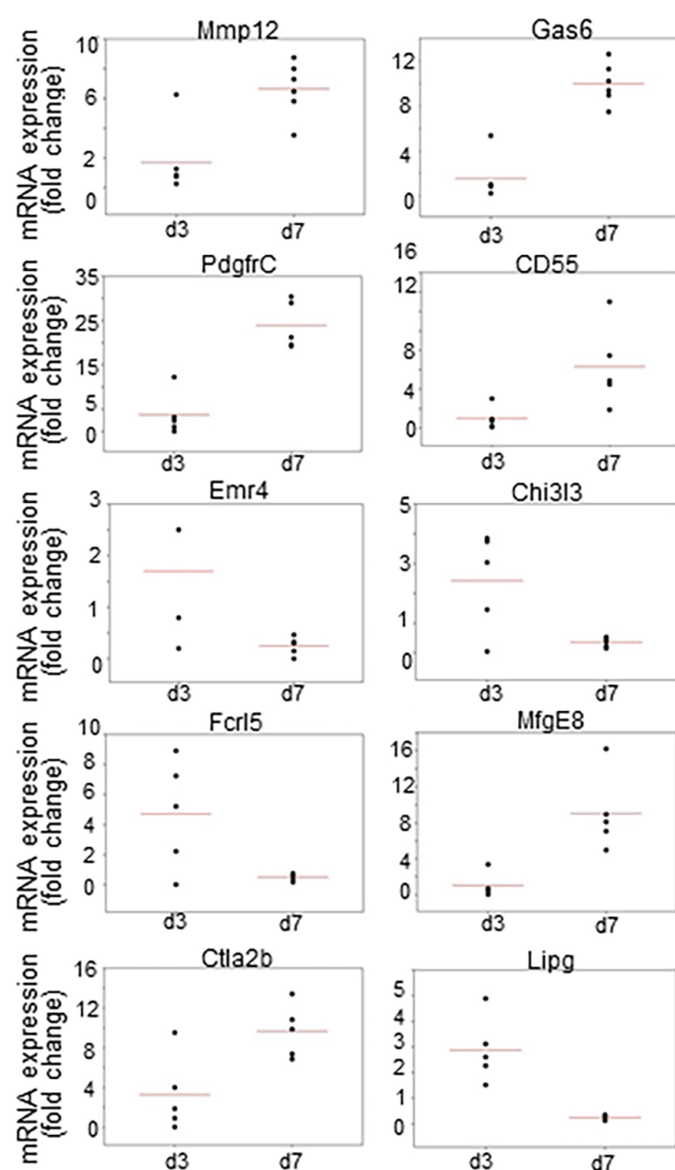

**b**

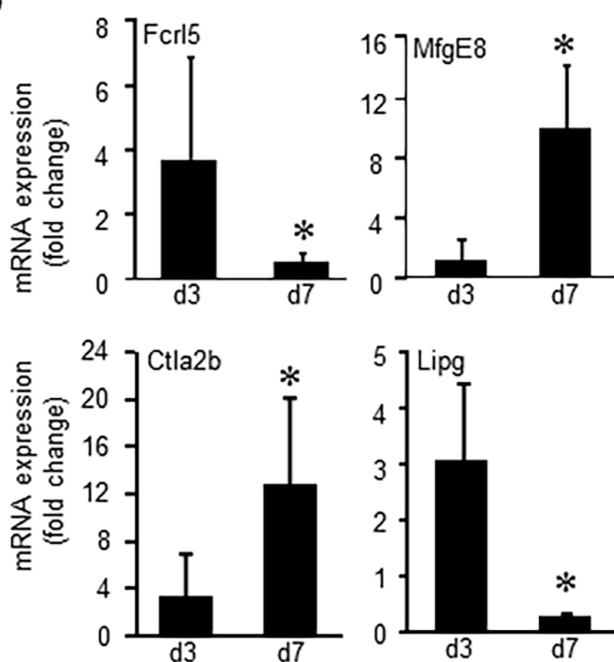

**Supplementary Figure 4** (a) FSP1 (green) and F4/80 (red) immuno-staining of d7 wounds from MFG-E8<sup>+/+</sup> and MFG-E8<sup>-/-</sup> mice. FSP1 intensity expressed in arbitrary units, n=5, Student's t test p<0.05, scale bar =50  $\mu$ m. (b) QRT PCR analysis of selected genes differentially expressed using transcriptome assay: Fcrl5, MfgE8, Ctla2b and Lipg mRNA expressions, n=5, Student's t test p<0.05 (c) QRT PCR analysis where statistically significant data with overlapping SD have been replotted with individual data points (Fig 3c and Supp Fig 4b).

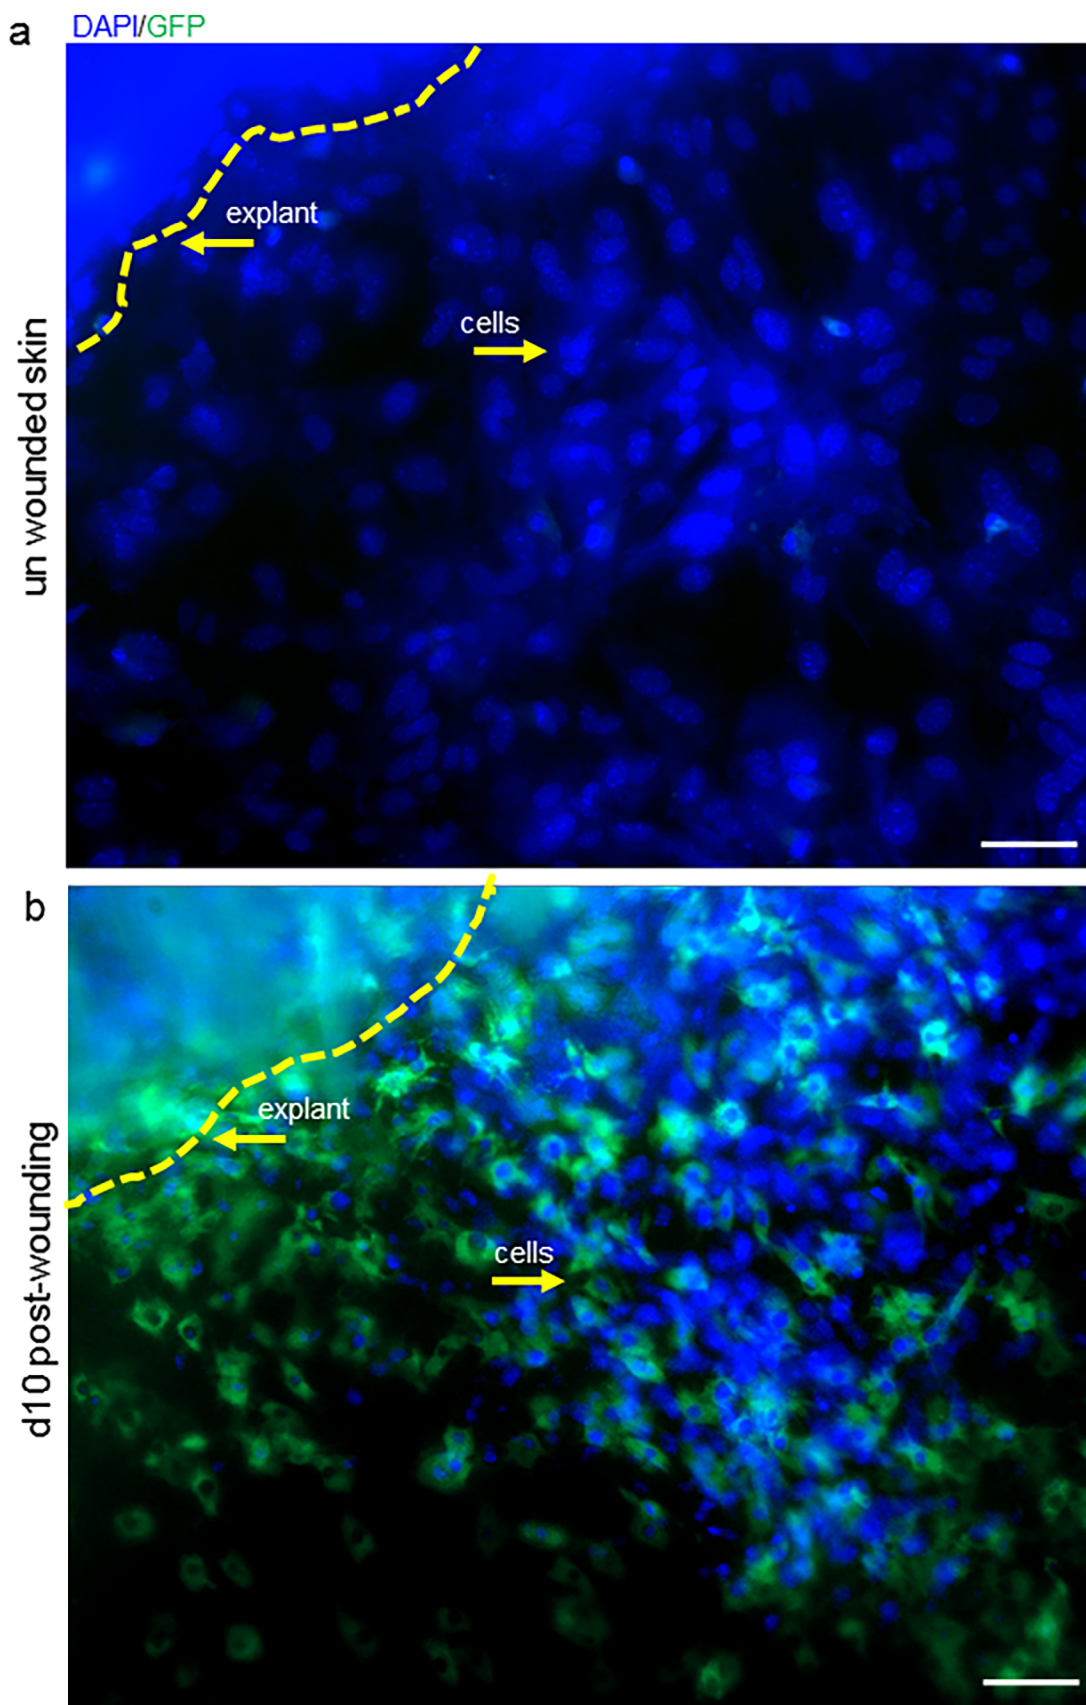

**Supplementary figure 5 (a-b)** Enlarged view of primary dermal fibroblasts isolated from wound/skin explants isolated of  $LysM^{Cre}Rosa^{mT/mG}$  mice (a) un-wounded skin, (b) d10 post-wounding. Yellow dotted lines indicates the margin of the skin explants,  $n=5$ , scale bar =50  $\mu$ m.

a

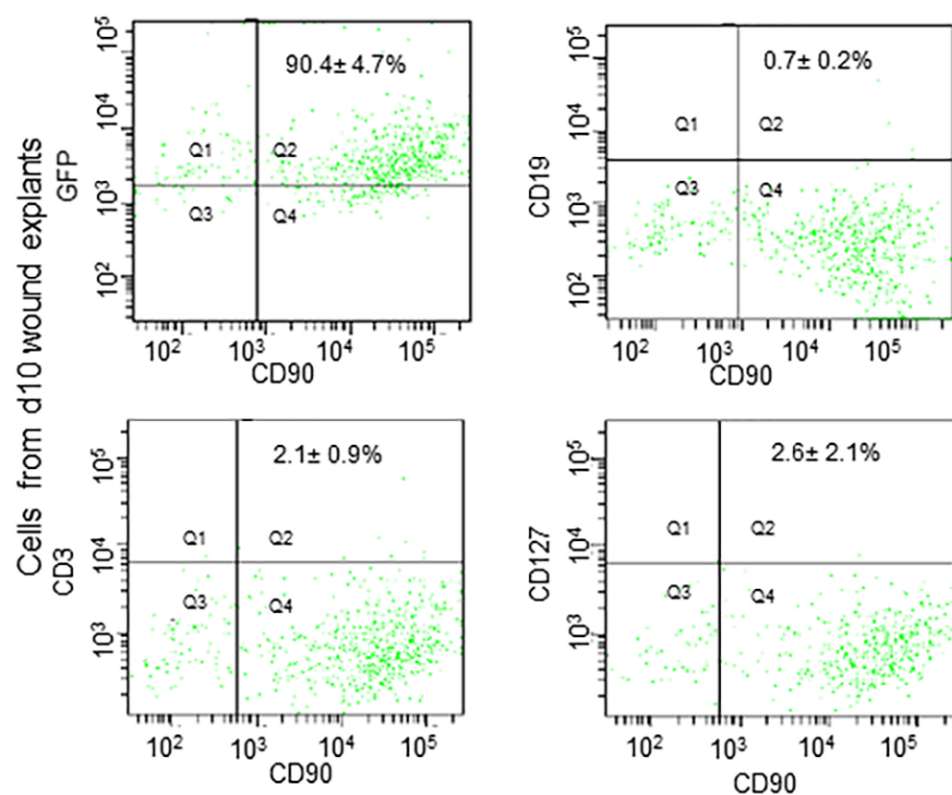

b

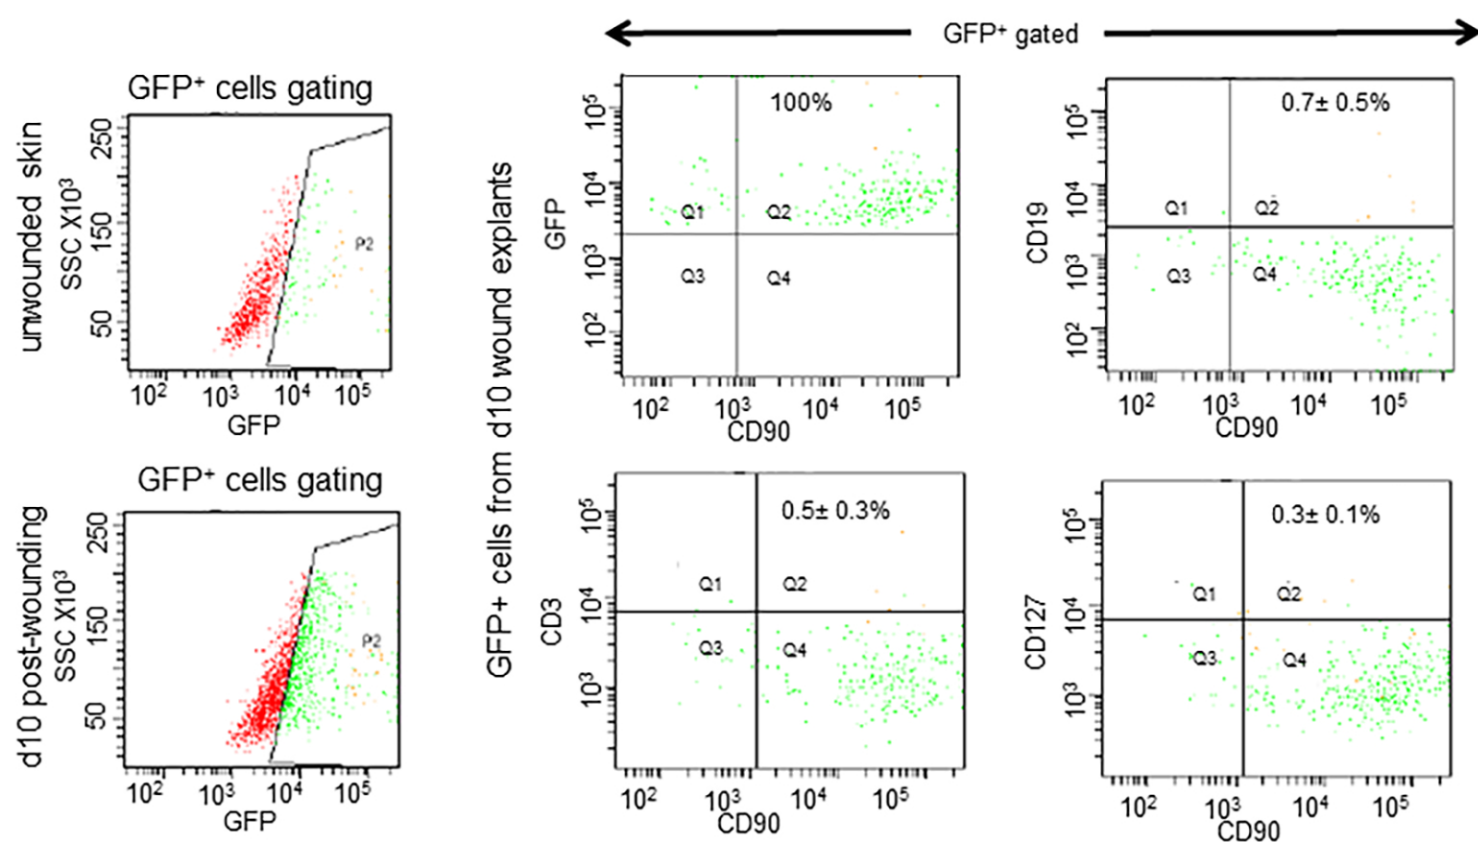

**Supplementary figure 6 (a)** Multicolor flow cytometry analysis of cells isolated from *Rosa<sup>mT/mG</sup>* mice d10 wound explants. The number of CD90+ cells dual positive for lymphoid markers were negligible (less than <5%). % data shown in Q2 are mean ± SD (n=4). **(b)** Multicolor flow cytometry analysis of cells isolated from *Rosa<sup>mT/mG</sup>* mice d10 wound explants. The analysis was performed in GFP gated cells of myeloid origin. The number of GFP+/CD90+ cells also positive for lymphoid markers were negligible (less than <2%). % data shown in Q2 are mean ± SD (n=4).

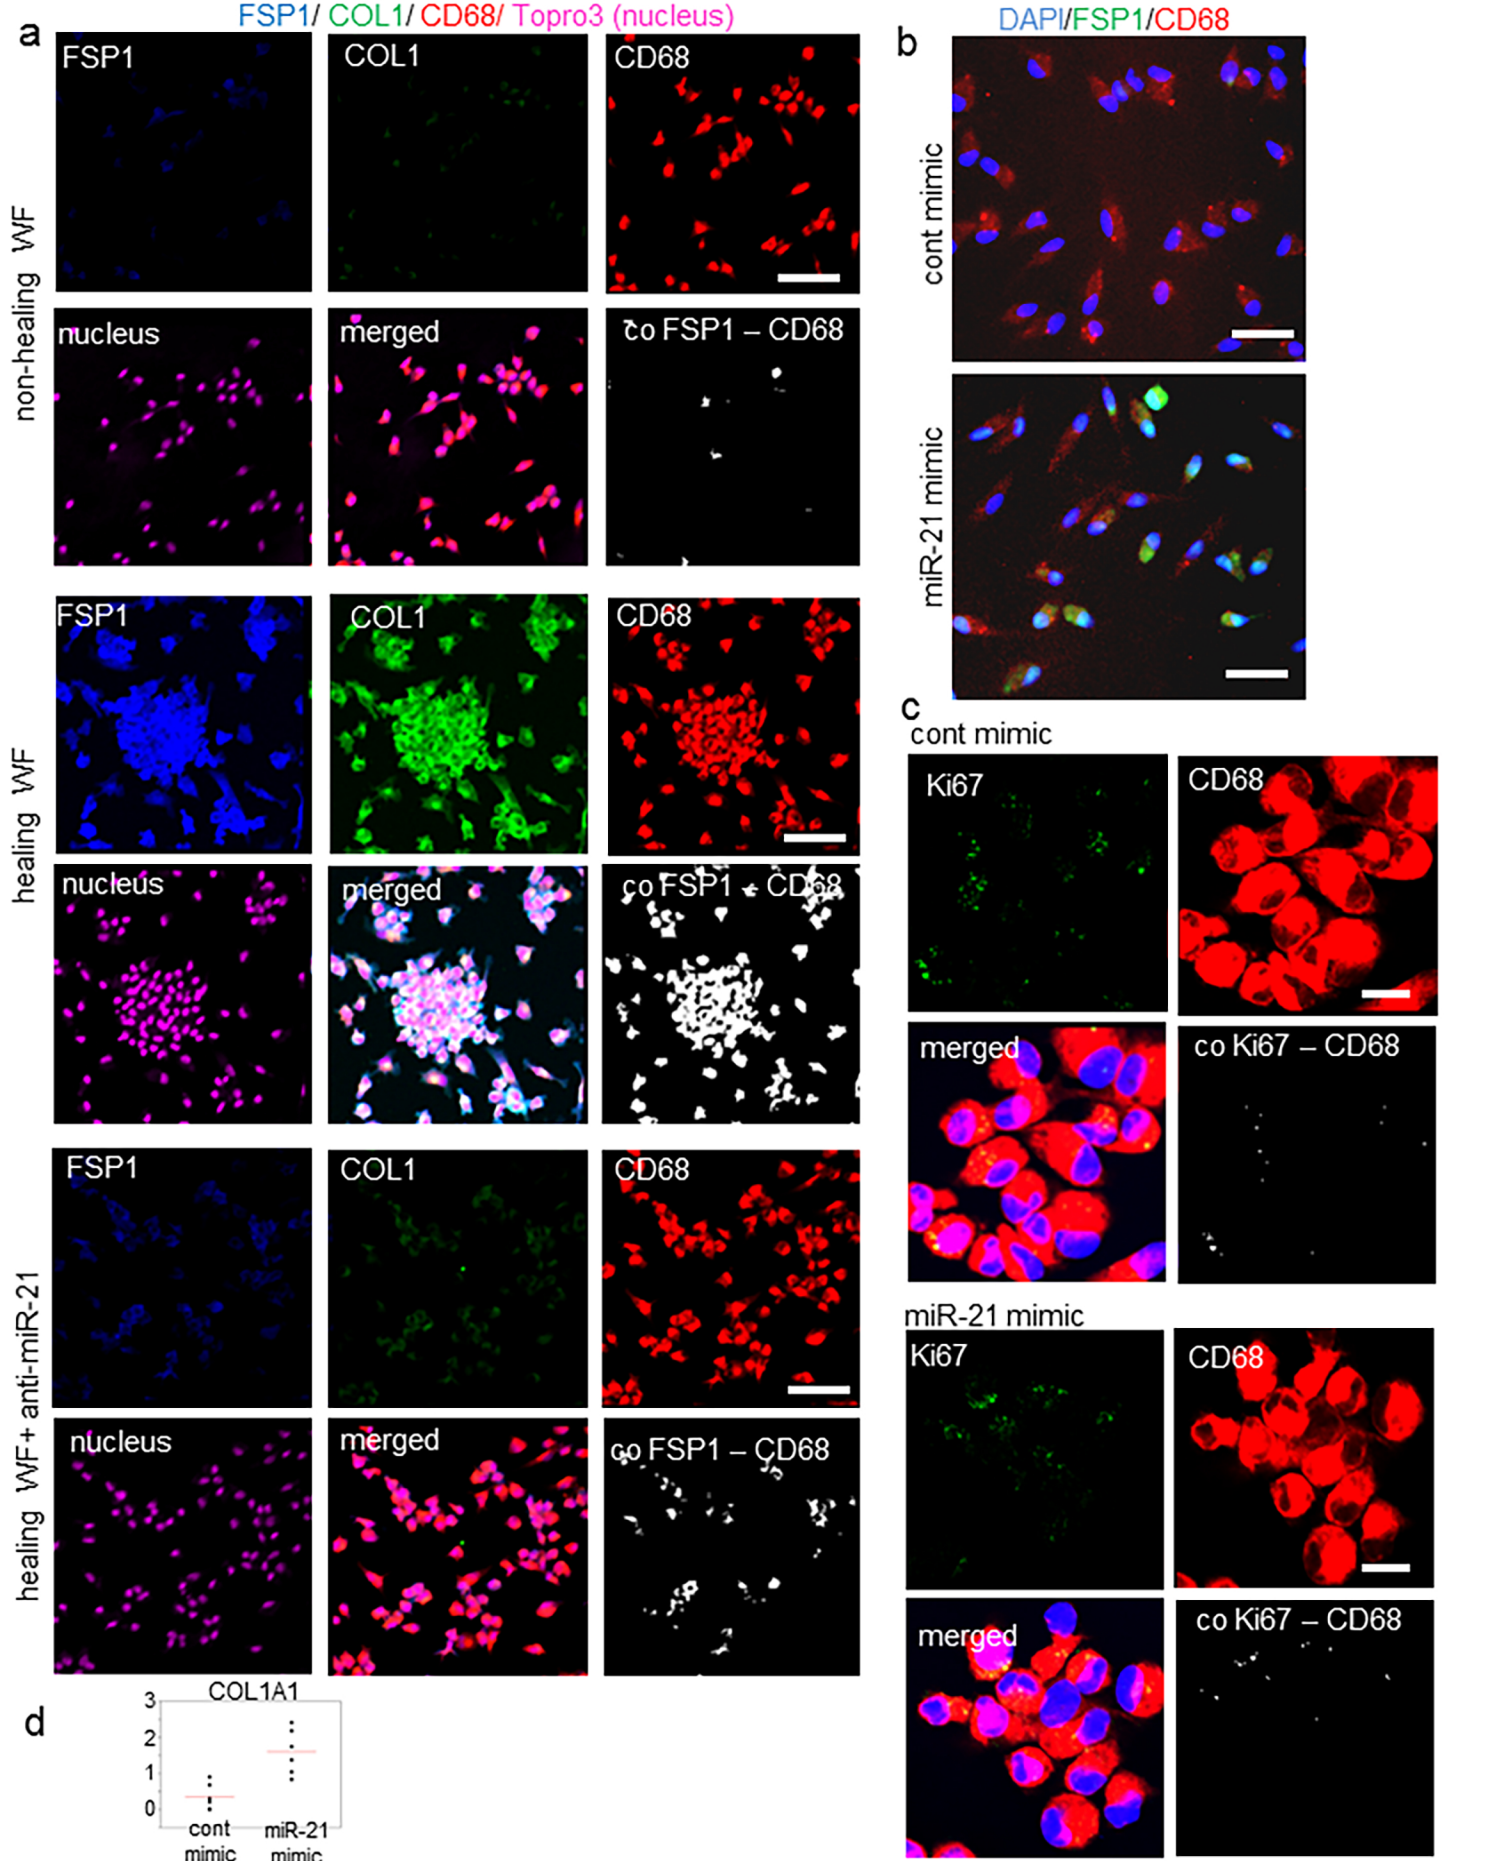

**Supplementary figure 7** (a) MDM were polarized to M1 macrophages with LPS and IFN $\gamma$ . Treatment of M1 polarized MDM (CD68 $^{+}$ , red) with fluids (WF) from non-healing wounds (heal $_{no}$ ), healing wounds (heal $_{hi}$ ) or healing wounds + antagomiR-21 (heal $_{hi}$ +antagomiR-21) for 72 h. CD68 (red), FSP1 (blue) COL1 (green) and nuclei (magenta) were determined using immunostaining, scale bar = 50  $\mu$ m, n=5. (b) miR-21 or control mimics were delivered to by immuno-staining with CD68 (macrophage, red) and FSP1 (fibroblast, green), scale bar = 100  $\mu$ m (wide view of Fig 5e). (c) Macrophage (CD68, red) and Ki67, green immuno-staining of M1 polarized MDM followed by transfection with miR-21 mimic and scrambled oligo, n=5, p<0.05. (d) QRT PCR analysis where statistically significant data with overlapping SD have been replotted with individual data points (Fig 5i).

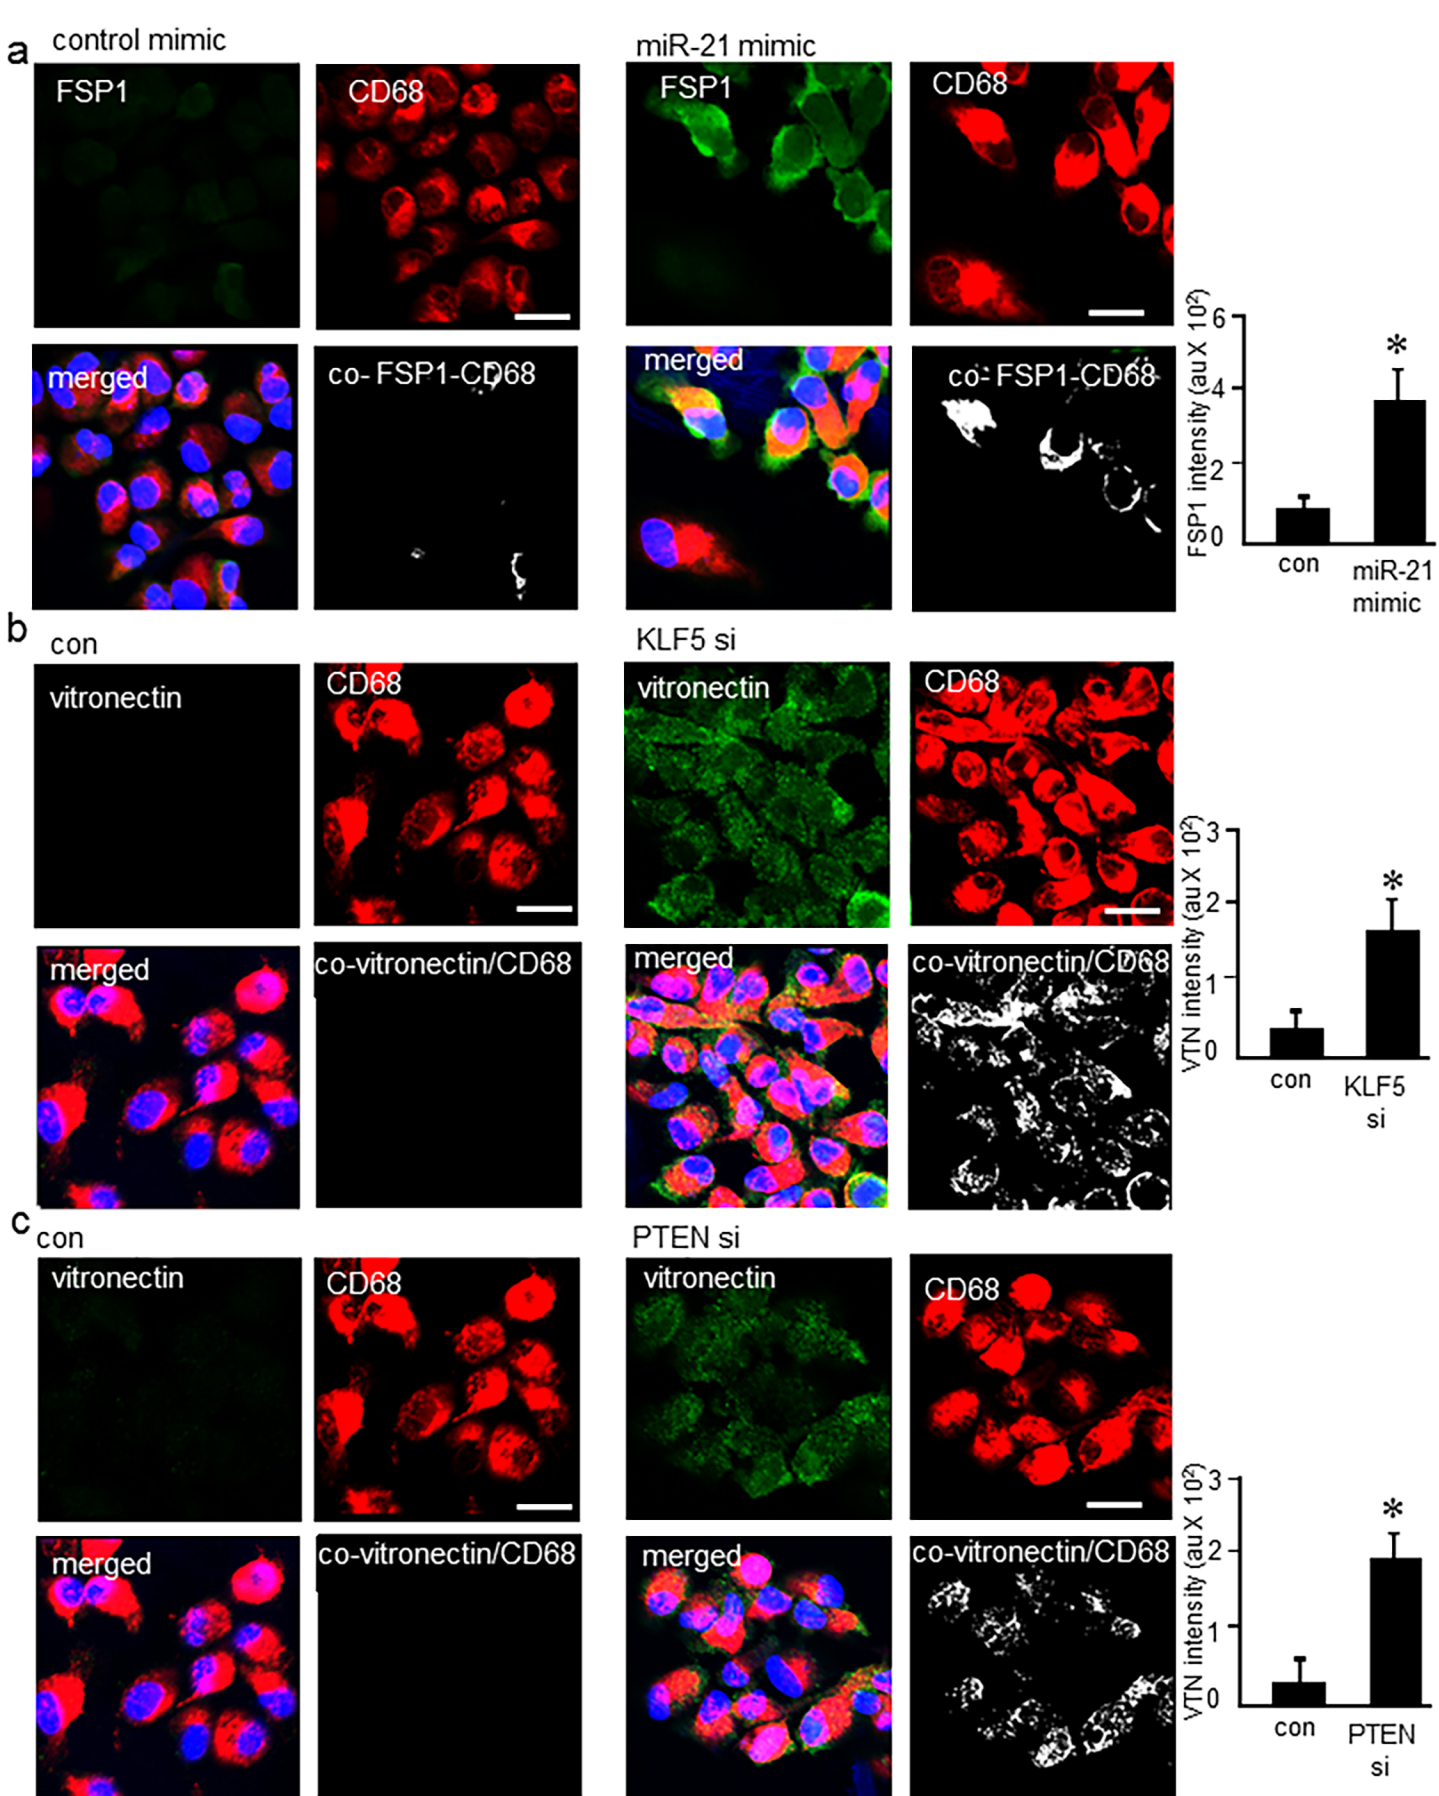

**Supplementary figure 8** (a) Macrophage (CD68, red) FSP1 (green) immuno-staining of human MDM polarized to M1 phenotype followed by transfection with miR-21 mimic or scrambled oligo, n=5, p<0.05. Quantification of FSP1 Expression, n=6, Student's t test p<0.05, scale bar =10  $\mu$ m. (b) Macrophage (CD68, red) and vitronectin (green) immuno-staining of human MDM polarized to M1 phenotype followed by transfection with PTEN si and scrambled oligo, n=6, Student's t test p<0.05. Vitronectin intensity analysis, n=5, Student's t test p<0.05, scale bar =10  $\mu$ m. (c) Macrophage (CD68, red) and vitronectin (green) immuno-staining of M1 polarized MDM followed by transfection with miR-21 mimic and scrambled oligo, n=6, Student's t test p<0.05. Vitronectin intensity analysis, n=5, Student's t test p<0.05, scale bar =10  $\mu$ m.



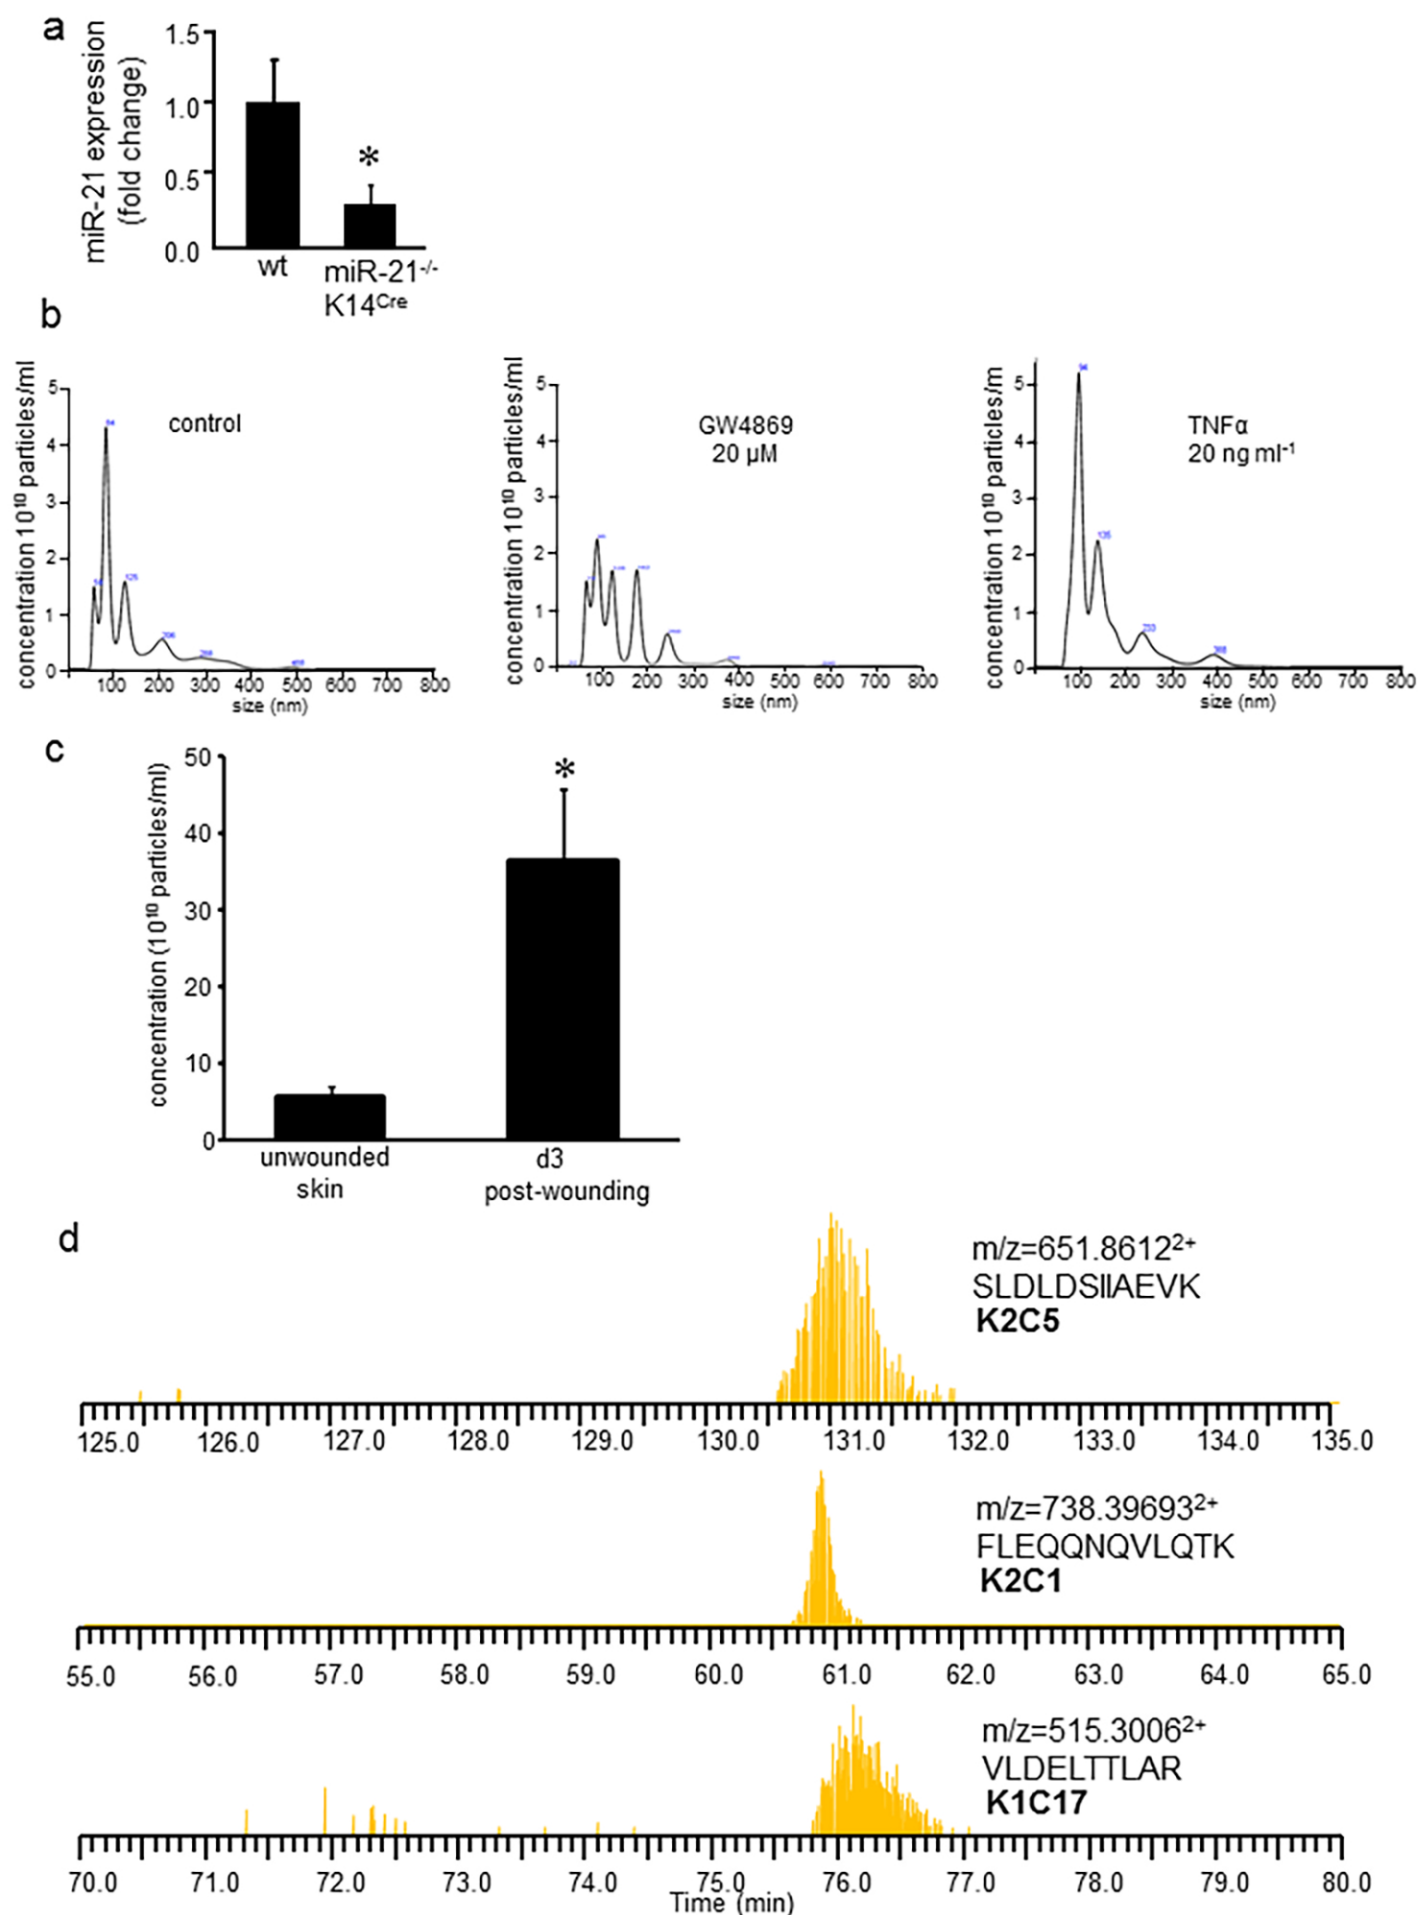

**Supplementary figure 9** (a) Q-RT PCR analysis of miR-21 expression from laser captured keratinocytes from miR-21<sup>fl/fl</sup> K14<sup>Cre</sup> and wt (miR-21<sup>fl/fl</sup>) mice, n=5, p<0.05. (b) Exosome concentration from human keratinocytes (HaCaT) treated with exosome inhibitor GW4869 or inflammatory cytokine TNFα, n=6, Student's t test p<0.05 (c) Exosome concentration from unwounded murine skin or d3 post-wounding tissue, n=6, Student's t test p<0.05 (d) LC-MS peaks of keratinocyte specific proteins K2C5, K2C1 and K1C17 with corresponding peptide signatures. The proteins were identified by proteome profiling of EVs isolated from wound fluid collected in Hunt-Schilling cylinders of mice, n=5-7.

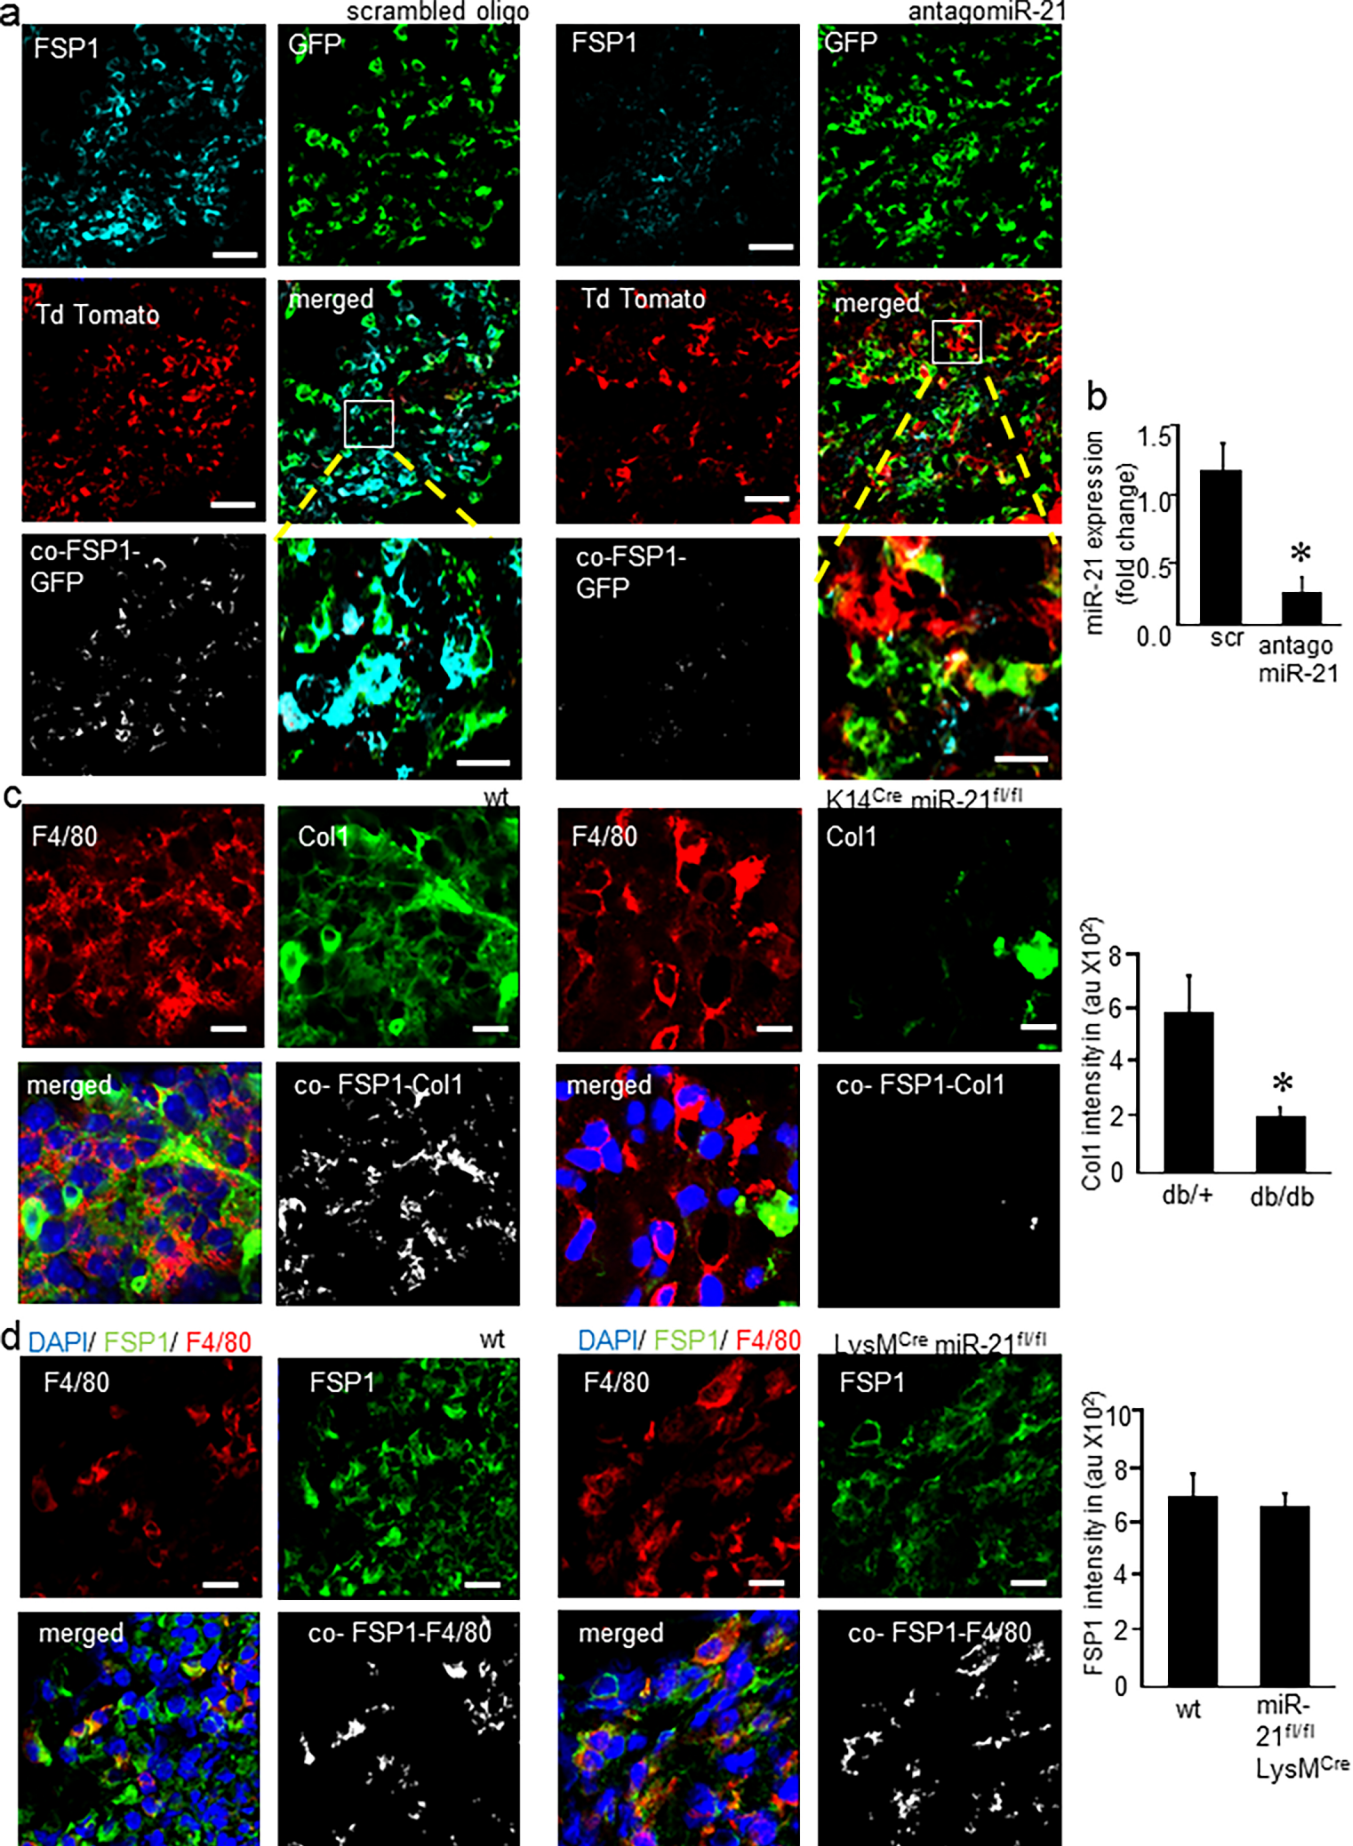

**Supplementary figure 10** (a) Immuno-staining with fibroblast marker FSP1 (cyan) immuno-staining of d5 wound tissue from *LysM<sup>Cre</sup>Rosa<sup>mT/mG</sup>* mice delivered with antagomiR-21 or scrambled oligo, scale bar = 50  $\mu$ m, scale bar of inset = 10  $\mu$ m. (b) Q-RT PCR analysis of miR-21 expression in laser captured keratinocytes from *LysM<sup>Cre</sup>Rosa<sup>mT/mG</sup>* mice delivered with antagomiR-21 or scrambled oligo, n=5, p<0.05. (c) Macrophage (F4/80, red) and fibroblast (Col1, green) immuno-staining of d5 wound tissue from wt (miR-21<sup>fl/fl</sup>) and miR-21<sup>fl/fl</sup> K14<sup>Cre</sup>, n=5, p<0.05, scale bar = 10  $\mu$ m, n=5. Col1 intensity analysis in wt and miR-21<sup>fl/fl</sup> K14<sup>Cre</sup>, n=5, p<0.05, scale bar = 10  $\mu$ m. (d) Macrophage (F4/80, red) and fibroblast (FSP1, green) immuno-staining of d5 wound tissue from wt (miR-21<sup>fl/fl</sup>) and miR-21<sup>fl/fl</sup> *LysM<sup>Cre</sup>*, n=5, p<0.05, scale bar = 10  $\mu$ m, n=5. FSP1 intensity analysis in wt and miR-21<sup>fl/fl</sup> *LysM<sup>Cre</sup>*, n=5, p<0.05, scale bar = 10  $\mu$ m.

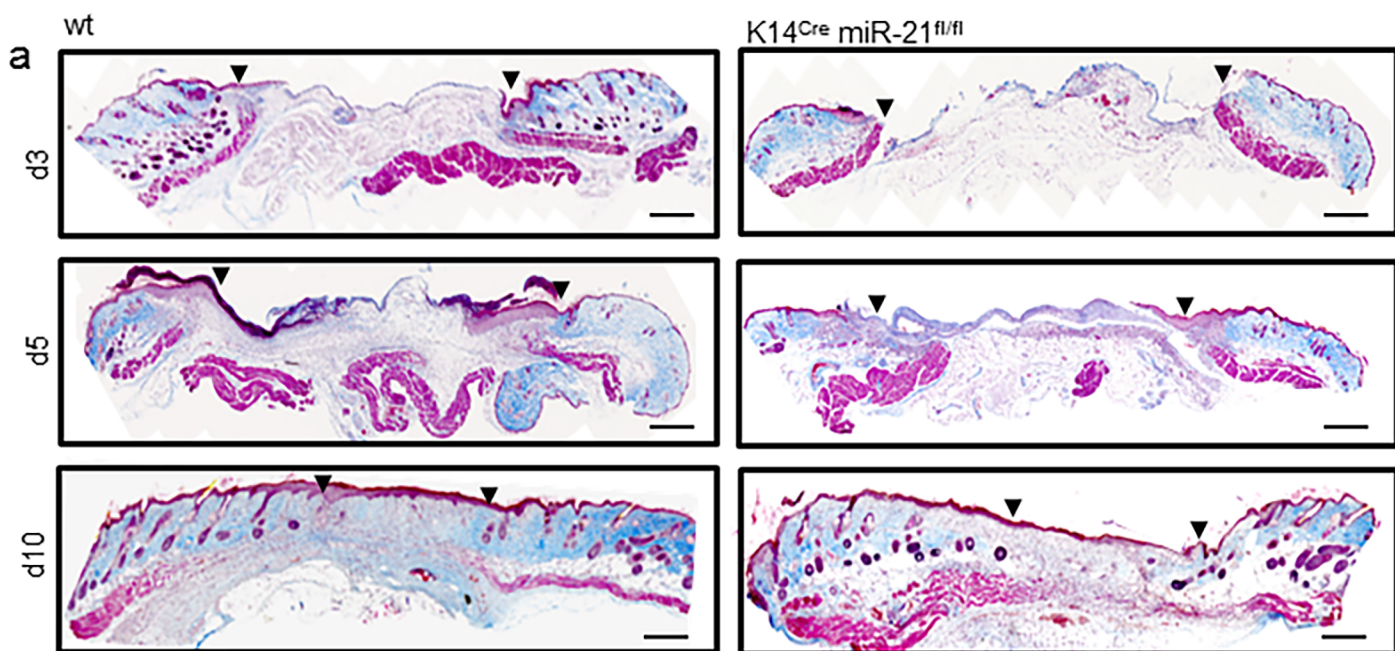

**Supplementary figure 11 (a)** Whole mount of Masson's Trichrome stained wounds from wt(miR-21<sup>fl/fl</sup>) or miR-21<sup>fl/fl</sup> K14<sup>Cre</sup> mice, n=5, wound edge shown with black arrow head, scale bar = 200  $\mu$ m.

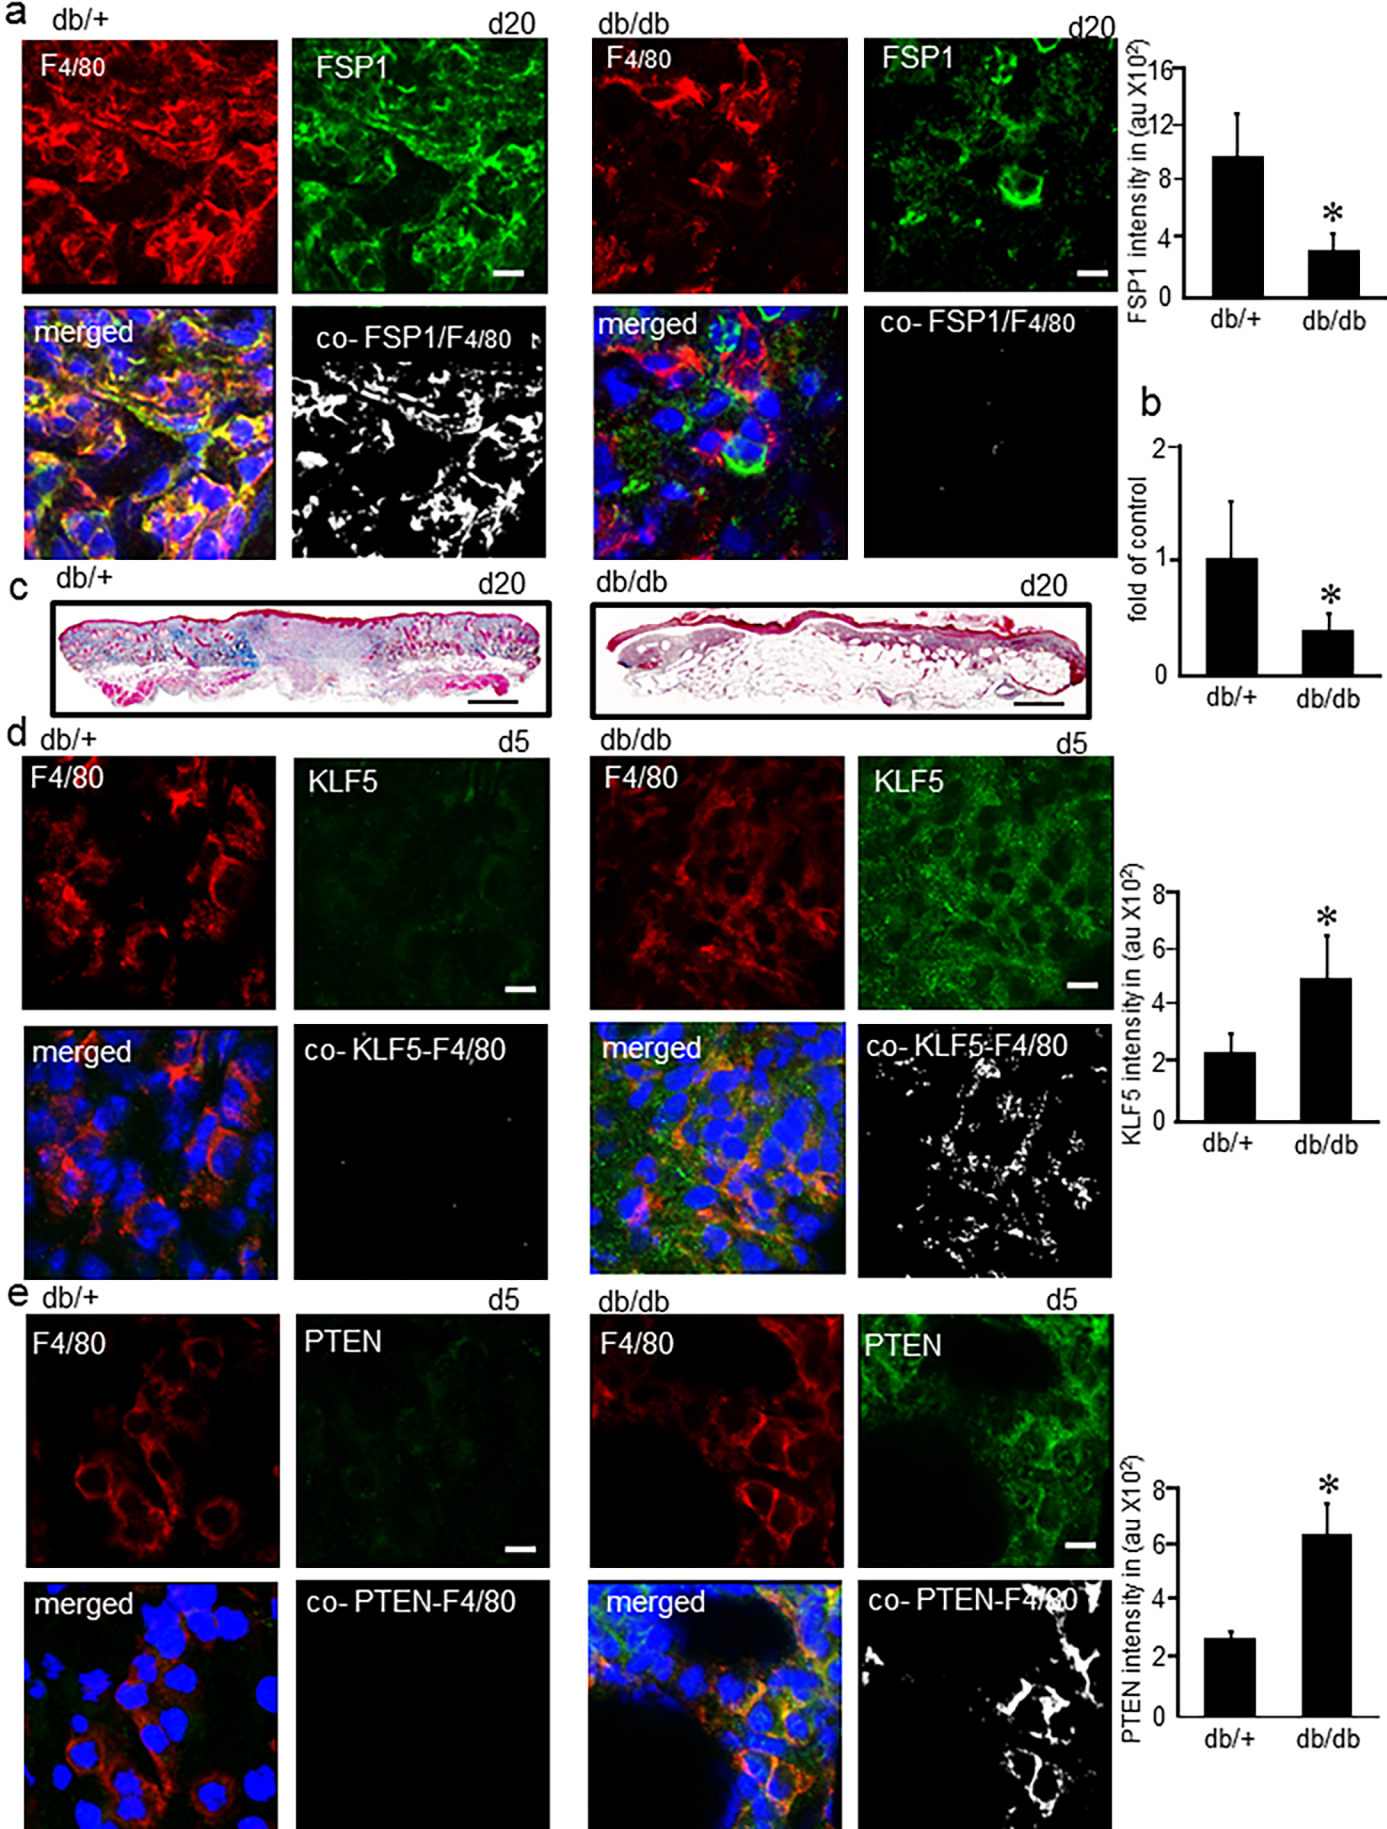

**Supplementary figure 12** (a) Immuno-staining of F4/80 (macrophage, red) and FSP1 (fibroblast, green) of d20 wound tissue from control db/+ and db/db mice. n=5, p<0.05. FSP1 intensity expressed in arbitrary units. n=5, Student's t test p<0.05, scale bar = 10  $\mu$ m (b) Q-RT PCR analysis of miR-21 expression in wound tissue from db/db or control db/+ mice on d20 post-wounding. n=5, p<0.05. (c) Whole mounts of Masson's Trichrome stained d20 wound sections showing collagen (blue) levels in db/db and control db/+ mice, n=5, scale bar = 200  $\mu$ m (d) Macrophage (F4/80, red) and KLF5 (green) immuno-staining in d5 wound tissue from control db/+ and db/db mice, scale bar = 10  $\mu$ m. Bar graphs present quantification of KLF5 in db/db and control db/+ mice, n=5 p<0.05 (e) Macrophage (F4/80, red) and PTEN (green) immuno-staining of d5 wound tissue from control db/+ and db/db mice, scale bar = 10  $\mu$ m. Bar graphs present quantification of PTEN in db/db and control db/+ mice, n=6, p<0.05

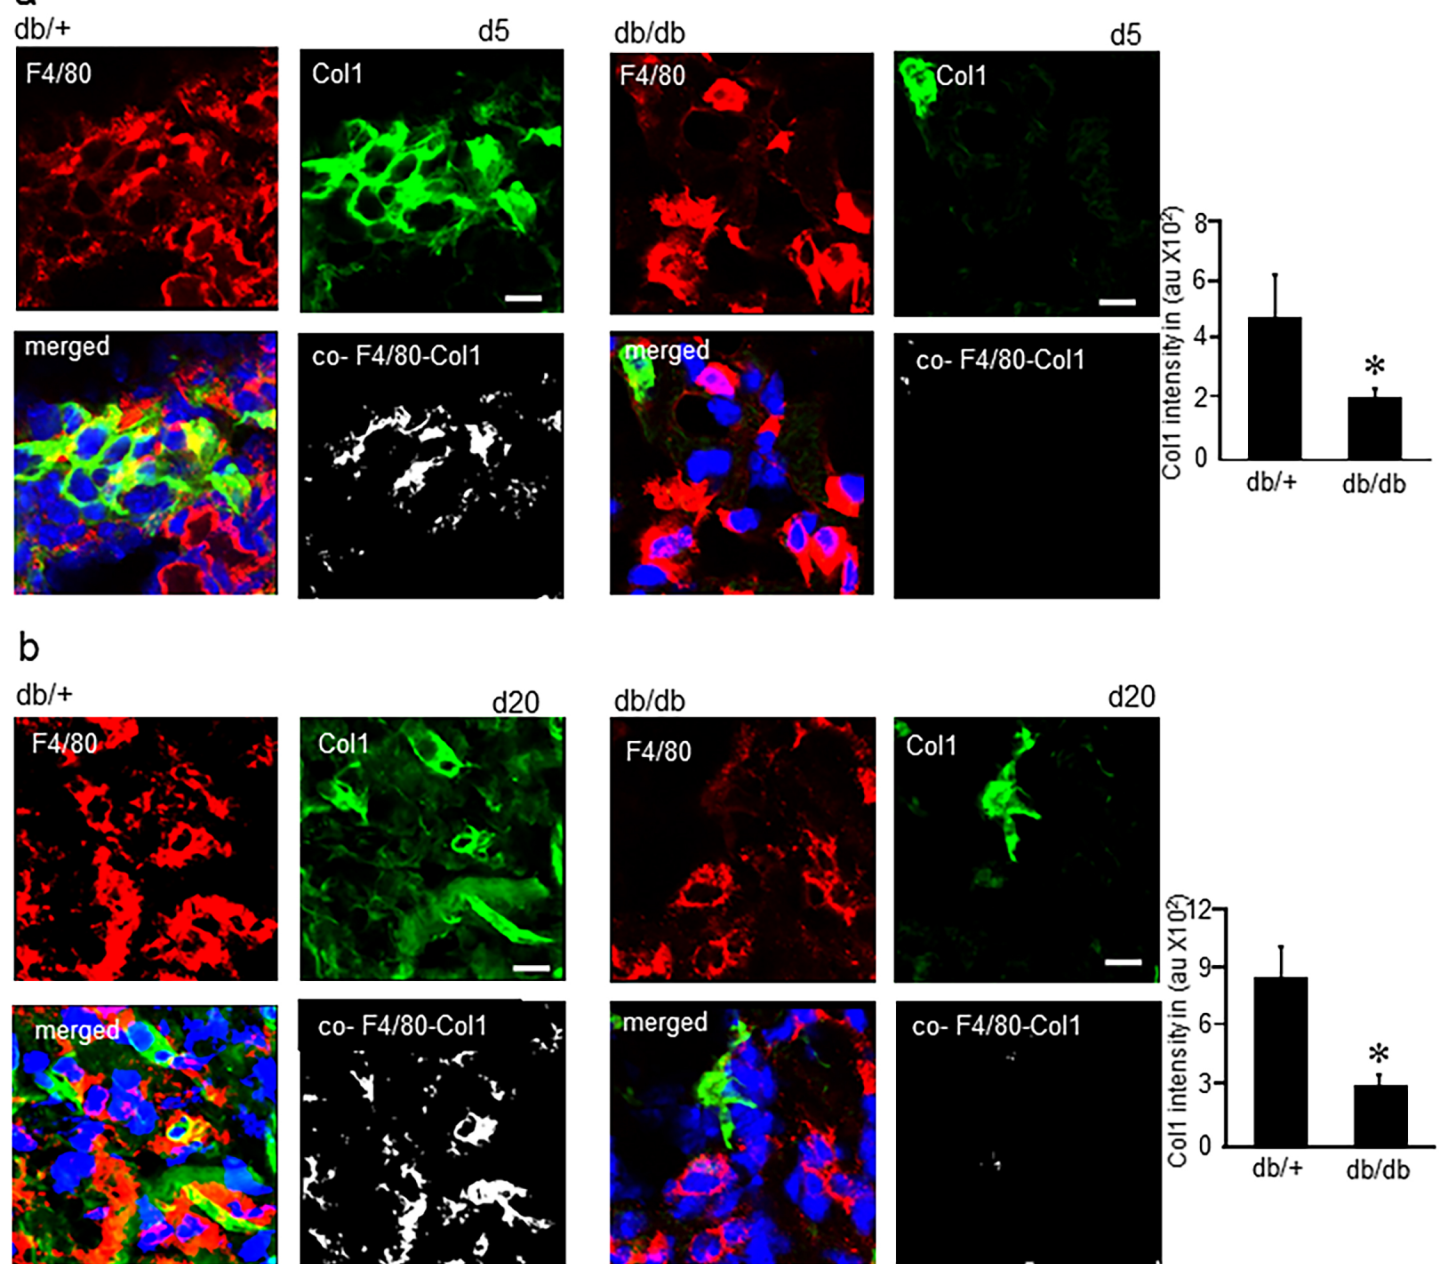

**Supplementary figure 13** (a) Macrophage (F4/80, red) and fibroblast (Col1, green) immuno-staining in d5 wound tissue from control db/+ or db/db mice, n=5, Student's t test, p<0.05, scale bar =10  $\mu$ m, n=5. Bar graphs present quantification of Col1a1 in control db/+ or db/db mice, n=5, p<0.05, scale bar =10  $\mu$ m. (b) Macrophage (F4/80, red) and fibroblast (Col1, green) immuno-staining of d20 post-wounding from control db/+ or db/db mice, n=5, Student's t test, p<0.05, scale bar =10  $\mu$ m, n=5. Bar graphs present quantification of Col1 analysis in control db/+ and db/db mice, n=5, Student's t test p<0.05, scale bar =10  $\mu$ m.

**Supplementary Table 1-** Primer information for genotyping

|          | <b>Primer</b>                      | <b>Type</b>       |
|----------|------------------------------------|-------------------|
|          | <u><i>Rosa mT/mG</i></u>           |                   |
| oIMR7318 | CTC TGC TGC CTC CTG GCT TCT        | Common forward    |
| oIMR7319 | CGA GGC GGA TCA CAA GCA ATA        | Wild type reverse |
| oIMR7320 | TCA ATG GGC GGG GGT CGT T          | Mutant reverse    |
|          | <u><i>LysM Cre</i></u>             |                   |
| oIMR3066 | CCC AGA AAT GCC AGA TTA CG         | Mutant forward    |
| oIMR3067 | CTT GGG CTG CCA GAA TTT CTC        | Common reverse    |
| oIMR3068 | TTA CAG TCG GCC AGG CTG AC         | Wild type reverse |
|          | <u><i>K14 Cre</i></u>              |                   |
| oIMR1084 | GCG GTC TGG CAG TAA AAA CTA TC     | Transgene forward |
| oIMR1085 | GTG AAA CAG CAT TGC TGT CAC TT     | Transgene reverse |
|          | <u><i>miR-21</i></u>               |                   |
|          | GCT TAC TTC TCT CTG TGA TTT CTG TG | Forward           |
|          | GGT GGT ACA GCC ATG CGA TGT CAC G  | Reverse           |
|          |                                    |                   |

**Supplementary Table 2-** Primer information for Real Time PCR, human (h), mouse (m)

| <b>Gene Name</b> | <b>Forward Primer</b>       | <b>Reverse Primer</b>         |
|------------------|-----------------------------|-------------------------------|
| hFSP1            | TCT TTC TTG GTT TGA TCC TG  | GCA TCA AGC ACG TGT CTG AA    |
| hCol1A1          | CAG GTC TCG GTC ATG GTA CCT | GTC GAG GGC CAA GAC GAA       |
| hGAPDH           | TGA CGC TGG GGC TGG CAT TG  | GCT CTT GCT GGG GCT GGT GG    |
| mFSP1            | AGC TGC CTA GCT TCC TGG GGA | CCG GGG CTC CTT ATC TGG GCA   |
| mCol1a1          | CCC AAT GGT GAG ACG TGG AA  | TTG GGT CCC TCG ACT CCT AC    |
| mMMP12           | GAA CTT GCA GTC GGA GGG AA  | CCC AGT TGC TTC TAG CCC AA    |
| mGas6            | ATG AAG ATC GCG GTA GCT GG  | TGT TCG GGT GTA GTT GAG CC    |
| mPdgfrC          | GCC TTG GAG TCG TCG CTT C   | ATC TTG CAC TCC GTT CTG TTC C |
| mCD55            | CCC AGG AAA AGC AAC TTG CC  | CCC TGG GTT GCA TGA GAA GT    |
| mEmr4            | TGG AAC ACA CAA CCA CTG CT  | CAA GCC AAT GCC CCA AGA AC    |
| mChi3l3          | CCT GCC TGT GTA CTC ACC TG  | CTT CCT CGA GAC CCA GGG TA    |

|         |                            |                            |
|---------|----------------------------|----------------------------|
| mFcr15  | TAC CAT TGC GAG CAA GAG CA | AAA GTG GTC CAT GGA GGC TG |
| mCtla2b | CAG TGC TGT CTT CCT GCT CA | CCC CGC TCA TAG TCT GCA TT |
| mLipg   | GGG ACA GAG AGT AGC TGG GA | CCA AAG GAC AGC GTG TAG GT |
| mMfge8  | ACA GGC CTC CTG CTA GCC CC | CAA GCG GAC GTG GGC CTC TC |
| mGAPDH  | GTG CAG TGC CAG CCT CGT CC | GCA CCG GCC TCA CCC CAT TT |
